# Supplementary material for: Extraction and separation of anthocyanins from Kushui rose by ethanol-(NH 4 ) 2 SO 4 aqueous two-phase system
Source: Royal Society of Chemistry journal article supplement (doi:10.1039/d4ra03195d), 2024-01-01
Supplement: d4ra03195d1.pdf [file d4ra03195d1.pdf]

**Extraction and separation of anthocyanins from Kushui rose by  
ethanol-(NH<sub>4</sub>)<sub>2</sub>SO<sub>4</sub> aqueous two-phase system**

**Supplementary Information**

**Table S1**

Result of response surface methodology experiment.

| Run | Factor 1<br><i>A</i><br>g/g | Factor 2<br><i>B</i><br>g/g | Factor 3<br><i>C</i><br>°C | Response 1<br><i>Y</i><br>% | Response 2<br><i>K</i> |
|-----|-----------------------------|-----------------------------|----------------------------|-----------------------------|------------------------|
| 1   | 0.22                        | 0.21                        | 35                         | 62.60                       | 3.13                   |
| 2   | 0.19                        | 0.21                        | 35                         | 39.11                       | 1.87                   |
| 3   | 0.22                        | 0.25                        | 35                         | 81.28                       | 5.82                   |
| 4   | 0.22                        | 0.23                        | 15                         | 70.80                       | 3.92                   |
| 5   | 0.205                       | 0.23                        | 35                         | 72.57                       | 3.56                   |
| 6   | 0.205                       | 0.21                        | 55                         | 41.55                       | 1.90                   |
| 7   | 0.205                       | 0.25                        | 15                         | 78.16                       | 4.03                   |
| 8   | 0.205                       | 0.25                        | 55                         | 75.08                       | 3.58                   |
| 9   | 0.205                       | 0.23                        | 35                         | 70.02                       | 3.45                   |
| 10  | 0.22                        | 0.23                        | 55                         | 66.13                       | 3.36                   |
| 11  | 0.205                       | 0.21                        | 15                         | 60.94                       | 2.23                   |
| 12  | 0.19                        | 0.23                        | 15                         | 71.16                       | 2.47                   |
| 13  | 0.19                        | 0.23                        | 55                         | 57.84                       | 1.96                   |
| 14  | 0.205                       | 0.23                        | 35                         | 71.57                       | 3.58                   |
| 15  | 0.205                       | 0.23                        | 35                         | 75.63                       | 3.77                   |
| 16  | 0.19                        | 0.25                        | 35                         | 79.57                       | 3.66                   |
| 17  | 0.205                       | 0.23                        | 35                         | 74.39                       | 3.61                   |

**Table S2**

ANOVA results of response surface quadratic model for the yield of anthocyanins.

| Source                | Sum of Squares | df | Mean Square | F-value | p-value  |                 |
|-----------------------|----------------|----|-------------|---------|----------|-----------------|
| Model                 | 2266.44        | 9  | 251.83      | 25.76   | 0.0001   | significant     |
| <i>A</i>              | 137.26         | 1  | 137.26      | 14.04   | 0.0072   |                 |
| <i>B</i>              | 1509.46        | 1  | 1509.46     | 154.38  | < 0.0001 |                 |
| <i>C</i>              | 204.71         | 1  | 204.71      | 20.94   | 0.0026   |                 |
| <i>AB</i>             | 118.52         | 1  | 118.52      | 12.12   | 0.0102   |                 |
| <i>AC</i>             | 18.71          | 1  | 18.71       | 1.91    | 0.2091   |                 |
| <i>BC</i>             | 66.58          | 1  | 66.58       | 6.81    | 0.0349   |                 |
| <i>A</i> <sup>2</sup> | 22.71          | 1  | 22.71       | 2.32    | 0.1713   |                 |
| <i>B</i> <sup>2</sup> | 99.99          | 1  | 99.99       | 10.23   | 0.0151   |                 |
| <i>C</i> <sup>2</sup> | 68.40          | 1  | 68.40       | 7.00    | 0.0332   |                 |
| Residual              | 68.44          | 7  | 9.78        |         |          |                 |
| Lack of Fit           | 48.62          | 3  | 16.21       | 3.27    | 0.1412   | not significant |
| Pure Error            | 19.83          | 4  | 4.96        |         |          |                 |
| Cor Total             | 2334.88        | 16 |             |         |          |                 |

**Table S3**

ANOVA results of response surface quadratic model for the partition coefficient of anthocyanins.

| Source                | Sum of Squares | df | Mean Square | F-value     | p-value  |                 |
|-----------------------|----------------|----|-------------|-------------|----------|-----------------|
| Model                 | 15.3905357     | 9  | 1.710059523 | 52.24370839 | < 0.0001 | significant     |
| <i>A</i>              | 4.896991139    | 1  | 4.896991139 | 149.6070597 | < 0.0001 |                 |
| <i>B</i>              | 7.922953234    | 1  | 7.922953234 | 242.0526613 | < 0.0001 |                 |
| <i>C</i>              | 0.426898942    | 1  | 0.426898942 | 13.04210967 | 0.0086   |                 |
| <i>AB</i>             | 0.199269826    | 1  | 0.199269826 | 6.08785517  | 0.0430   |                 |
| <i>AC</i>             | 0.00065073     | 1  | 0.00065073  | 0.019880341 | 0.8918   |                 |
| <i>BC</i>             | 0.003250007    | 1  | 0.003250007 | 0.099290359 | 0.7619   |                 |
| <i>A</i> <sup>2</sup> | 0.000434304    | 1  | 0.000434304 | 0.013268353 | 0.9115   |                 |
| <i>B</i> <sup>2</sup> | 0.001155665    | 1  | 0.001155665 | 0.03530649  | 0.8563   |                 |
| <i>C</i> <sup>2</sup> | 1.935982529    | 1  | 1.935982529 | 59.14583986 | 0.0001   |                 |
| Residual              | 0.229126473    | 7  | 0.032732353 |             |          |                 |
| Lack of Fit           | 0.175622609    | 3  | 0.05854087  | 4.376571306 | 0.0939   | not significant |
| Pure Error            | 0.053503865    | 4  | 0.013375966 |             |          |                 |
| Cor Total             | 15.61966218    | 16 |             |             |          |                 |
| <i>R</i> <sup>2</sup> | 0.9853         |    |             |             |          |                 |
